# Supplementary material for: A comparison of the stability and performance of depth-integrated ice-dynamics solvers
Source: Copernicus journal article supplement (doi:10.5194/tc-16-689-2022), 2022-02-25
Supplement: Supplementary file 1 [file tc-16-689-2022-supplement.zip]

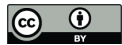

## *Supplement of*

# **A comparison of the stability and performance of depth-integrated ice-dynamics solvers**

**Alexander Robinson et al.**

*Correspondence to:* Alexander Robinson (robinson@ucm.es)

- tc-16-689-2022-supplement-title-page.pdf
- solver-stability-main
  - README.md
  - analtical\_hybrid1112\_iter.m
  - analytical\_diva.m
  - analytical\_hybrid.m
  - analytical\_1112.m
  - output
    - \* sampled\_diva\_strong.mat
    - \* sampled\_diva\_weak.mat
    - \* sampled\_hybrid\_strong.mat
    - \* sampled\_hybrid\_weak.mat
    - \* sampled\_1112\_strong.mat
    - \* sampled\_1112\_weak.mat
  - sample\_stability.m
  - stability\_test1D\_diva.m
  - stability\_test1D\_hybrid.m
  - stability\_test1D\_1112.m

The copyright of individual parts of the supplement might differ from the article licence.
